# Supplementary material for: Oxygen Tension Regulates Lysosomal Activation and Receptor Tyrosine Kinase Degradation
Source: MDPI journal article supplement (doi:10.3390/cancers11111653), 2019-10-25
Supplement: s1 [file s1]

# Supplementary Material: Oxygen Tension Regulates Lysosomal Activation and Receptor Tyrosine Kinase Degradation

Jaewoo Hong, Todd R. Wuest, Yongfen Min and P. Charles Lin

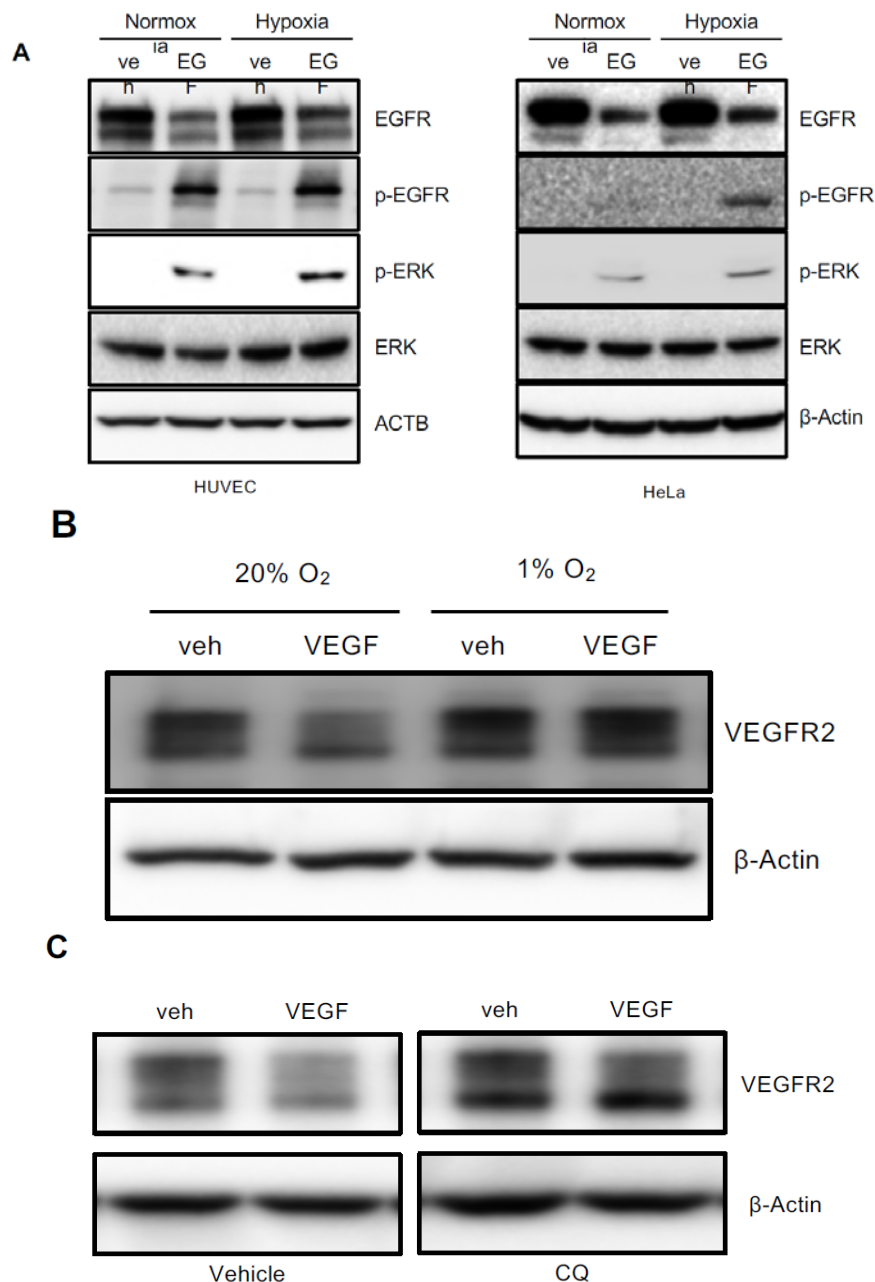

**Figure S1.** Serum-starved HUVECs and HeLa cells were cultured in either 20% or 1% oxygen in the presence or absence of 50 ng/mL of EGF for 5 h, followed by Western blot (A). Serum-starved HUVECs were cultured in either 20% or 1% oxygen in the presence or absence of 50 ng/mL of VEGF for 5 h, followed by Western blot (B). Serum-starved HUVECs were treated with 50 ng/mL of VEGF in the presence or absence of 5  $\mu$ M of chloroquine (CQ) for 5 h (C).

**A**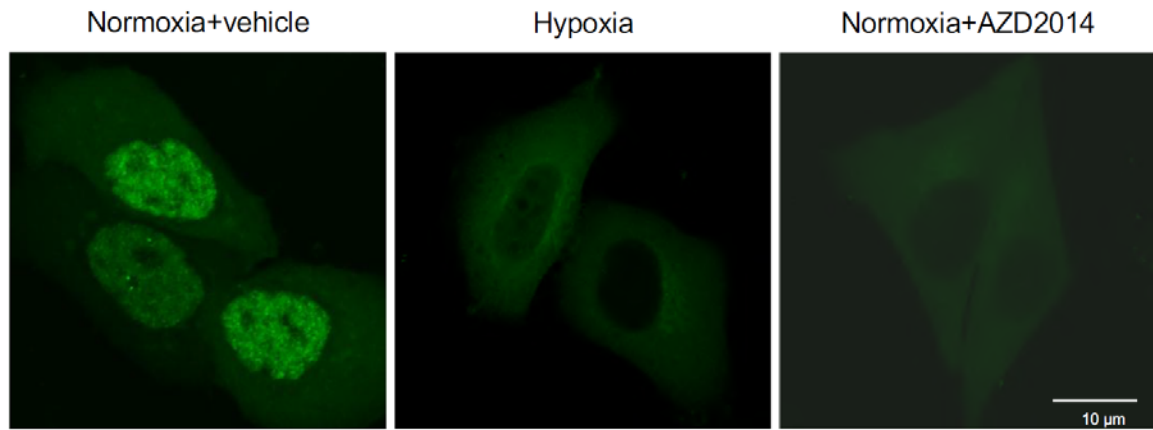**B**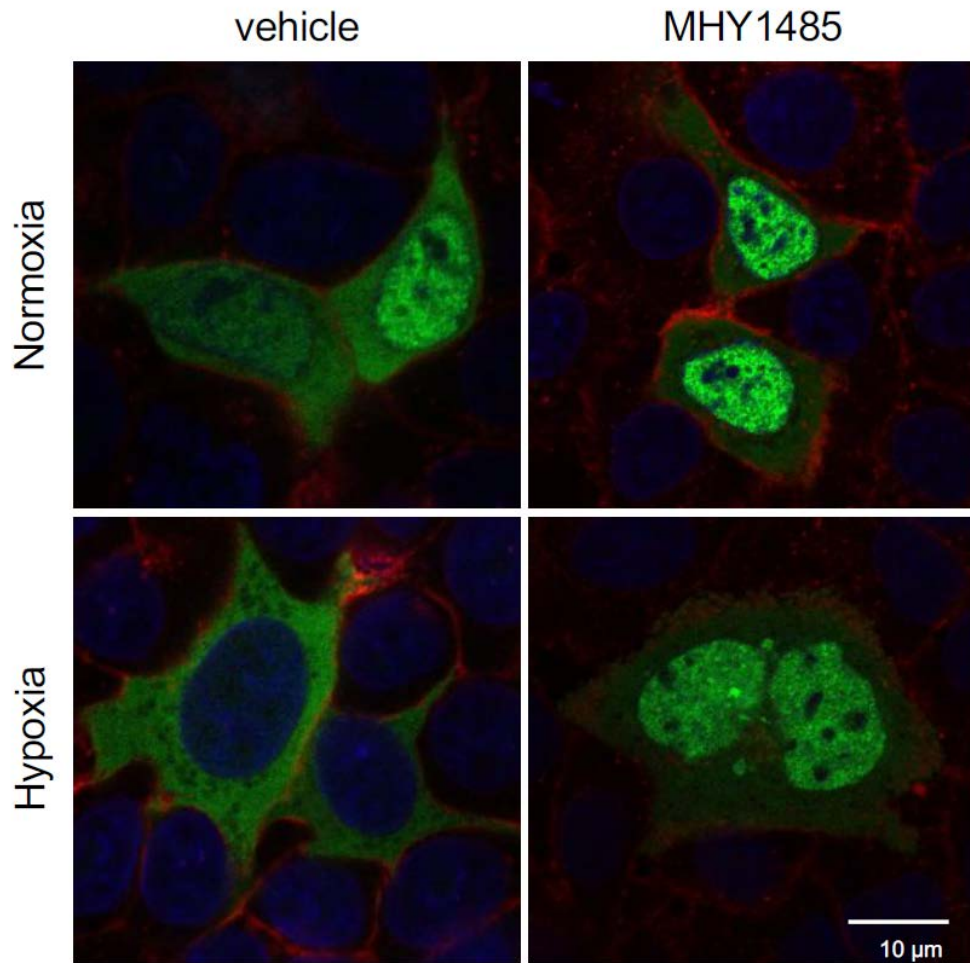

**Figure S2.** HeLa cells transfected with Myc tagged TFEB were incubated in 20% O<sub>2</sub> in the presence of absence of 10nM of AZD2014, or 1% O<sub>2</sub>, for 5 h, followed by immunostaining for TFEB (A). HeLa cells transfected with Myc tagged TFEB were incubated in 20% or 1% O<sub>2</sub> in the presence of absence of 2 µM of MHY1485 for 4 h, followed by immunostaining for TFEB (green) and counter stained for wheat germ agglutinin (red) (B). Images were collected from confocal microscopy. Representative images were shown.

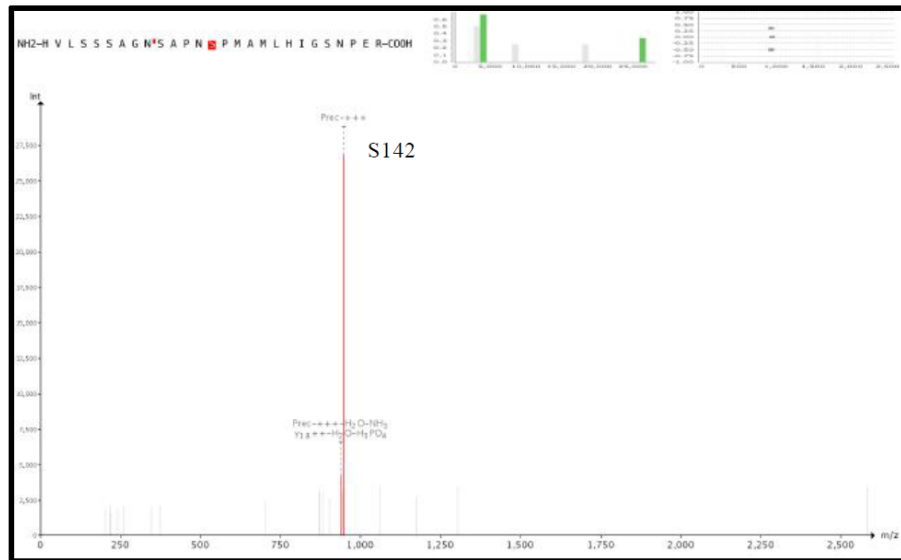

Vehicle

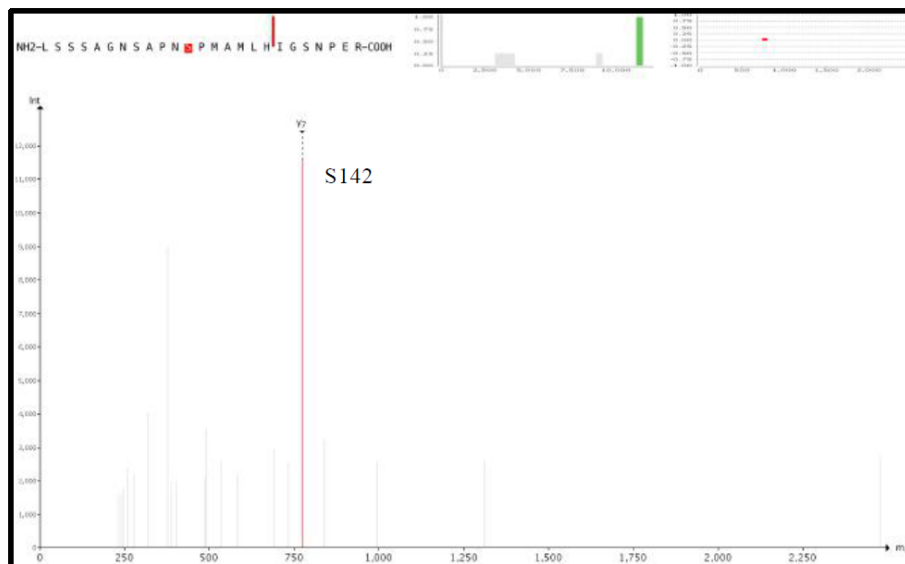

MHY1485

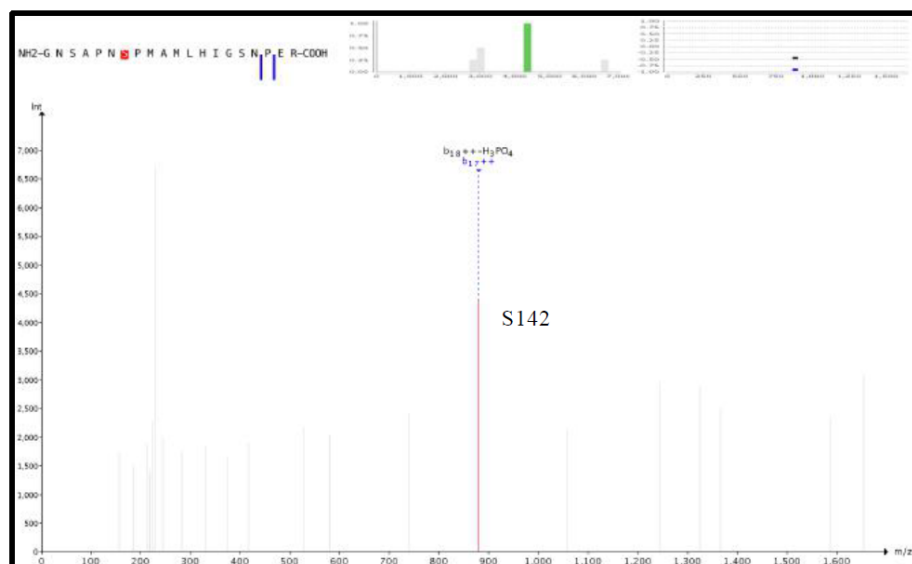

AZD2014

**Figure S3.** HeLa cells transfected with TFEB-myc expression vectors for 1 day, followed by stimulation with vehicle, 2  $\mu$ M of MHY1485 or 10 nM of AZD2014 for 30 min. TFEB was immunoprecipitated with antibodies against the Myc tag, followed by mass-spectrometry analysis.

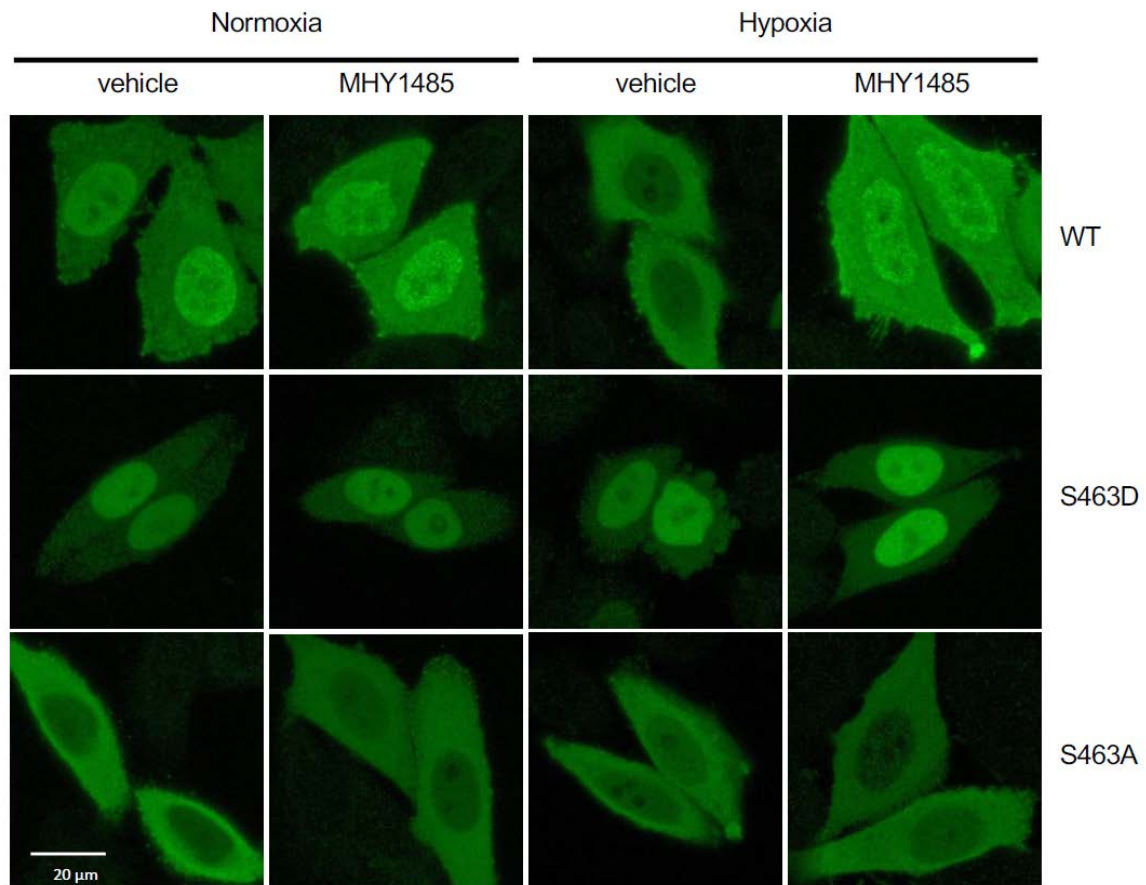

**Figure S4.** HeLa cells transfected with WT, S463A or S463D TFEB constructs were incubated in either 20% or 1% oxygen in the presence or absence of 2  $\mu$ M of MHY1485 for 4 h, followed by immunostaining for TFEB. Images were collected from confocal microscopy. Representative images were shown.

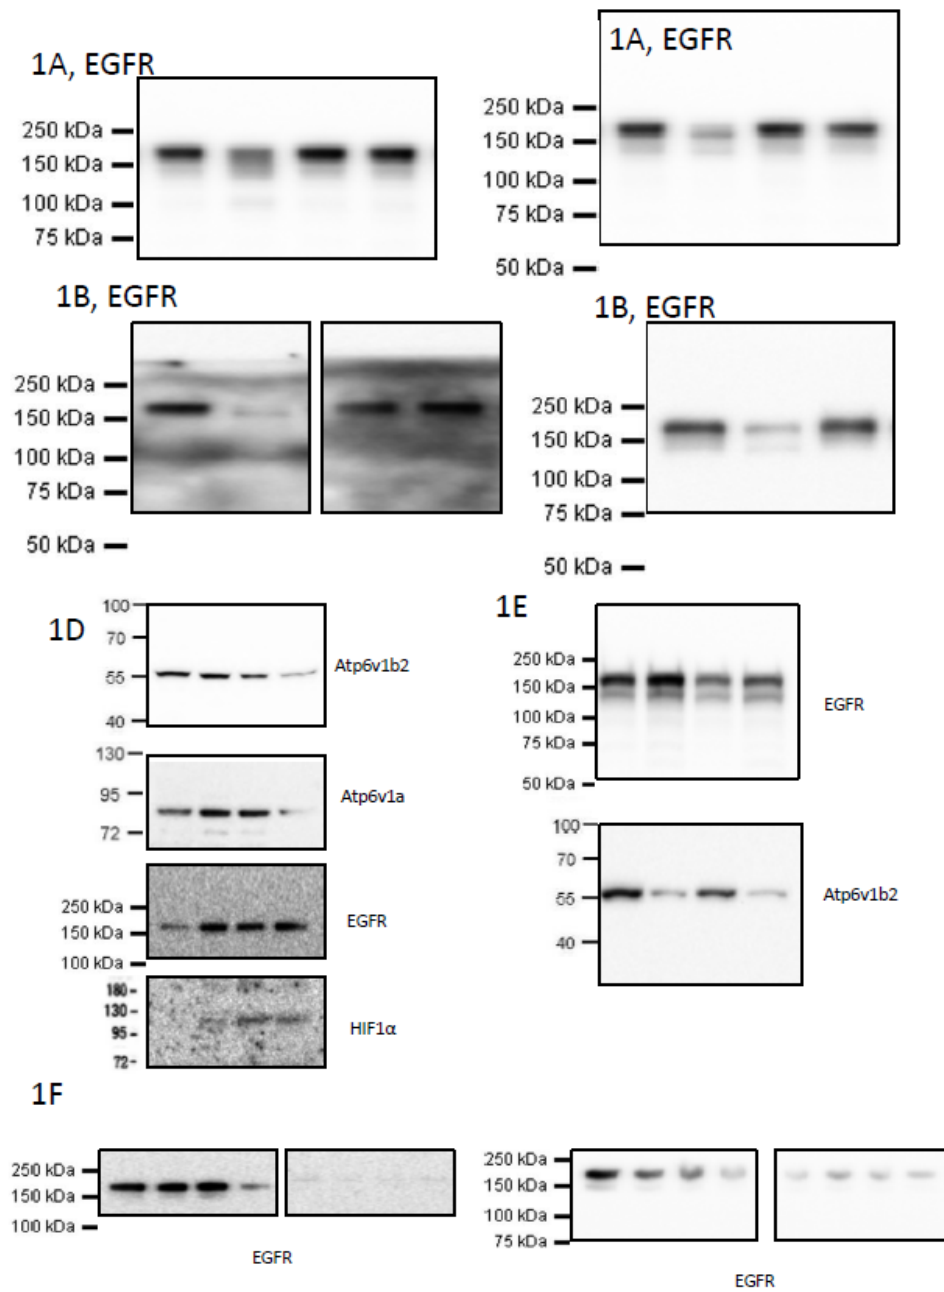

**Figure S5.** Raw data of Western blots from Figure 1.

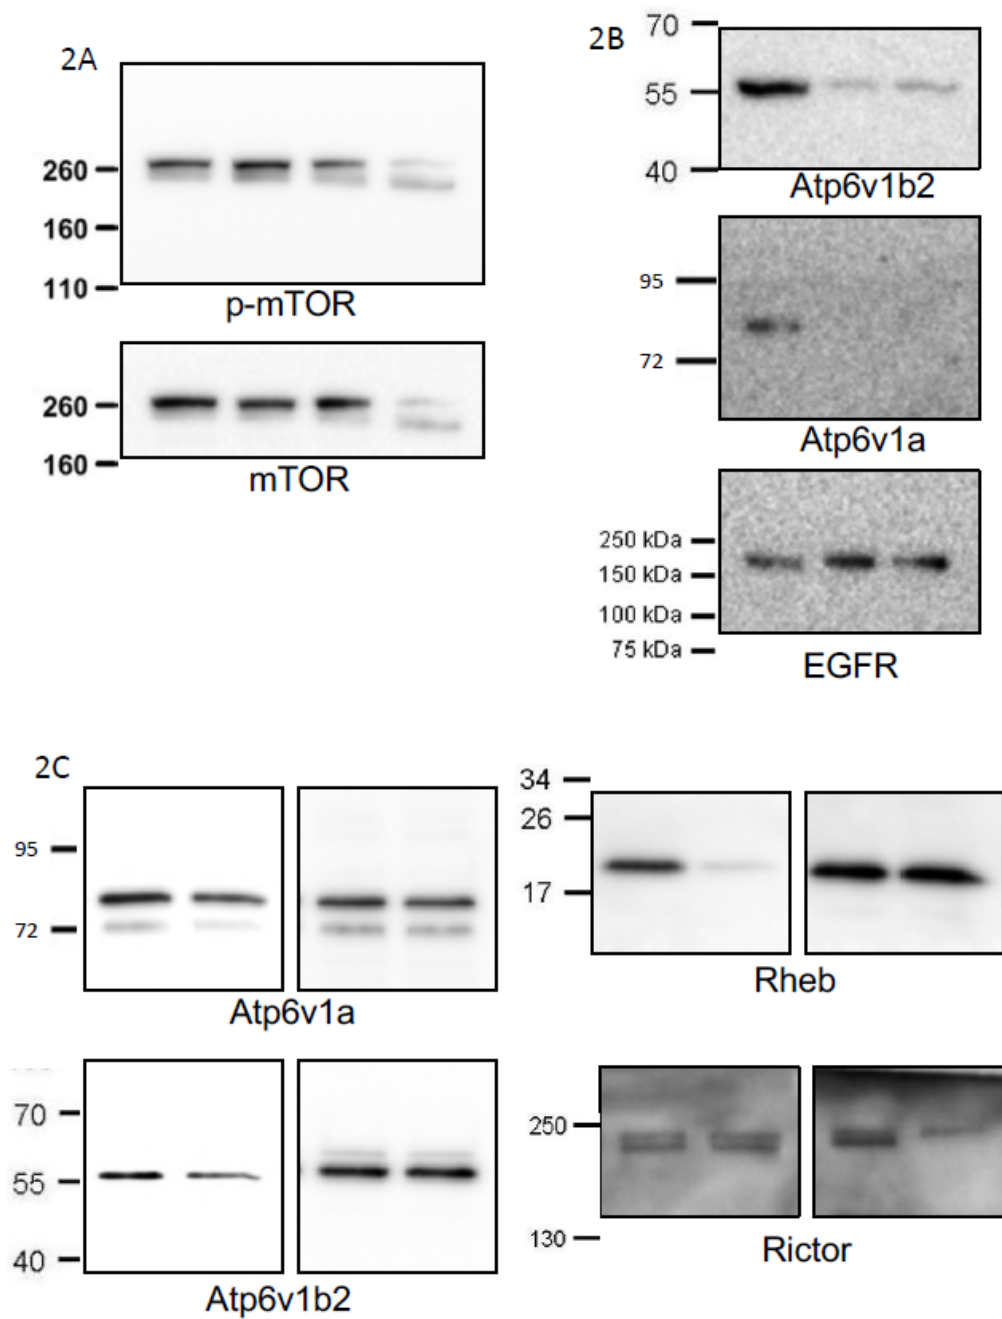

**Figure S6.** Raw data of Western blots from Figure 2.

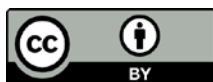

© 2019 by the authors. Licensee MDPI, Basel, Switzerland. This article is an open access article distributed under the terms and conditions of the Creative Commons Attribution (CC BY) license (<http://creativecommons.org/licenses/by/4.0/>).
